# Supplementary material
Source: PubMed Central journal article supplement (PMC6714462)
Supplement: jamasurg-154-994-s003.pdf [file jamasurg-154-994-s003.pdf]

## Data Sharing Statement

Sims. Arginine Vasopressin Supplementation in Early Traumatic Shock (AVERT Shock). *JAMA Surg.* Published August 28, 2019.  
10.1001/jamasurg.2019.2884

### Data

**Data available:** Yes

**Data types:** Data dictionary

**How to access data:** This has been included in the supplemental appendices

**When available:** With publication

### Supporting Documents

**Document types:** None

### Additional Information

**Who can access the data:** anyone requesting data

**Types of analyses:** no additional analysis unless approved by U Penn IRB

**Mechanisms of data availability:** after approval of a proposal and with a signed data access agreement
